# Supplementary material for: Deformed wing virus type A, a major honey bee pathogen, is vectored by the mite Varroa destructor in a non-propagative manner
Source: PubMed Central journal article supplement (PMC6712216; doi:10.1038/s41598-019-47447-3), 2019-08-27

## Supplementary Information

### **Title:**

**Deformed wing virus type A, a major honey bee pathogen, is vectored by the mite *Varroa destructor* in a non-propagative manner.**

### **Authors:**

Francisco Posada-Florez\*, Anna K. Childers, Matthew C. Heerman, Noble I. Egekwu, Steven C. Cook, Yanping Chen, Jay D. Evans, Eugene V. Ryabov\*

### **Affiliation:**

USDA, Agricultural Research Service, Bee Research Laboratory, Beltsville Agricultural Research Center, 10300 Baltimore Avenue, Bldg. 306, Beltsville MD 20705, USA

### **This PDF file includes:**

**Supplementary Table 1.** Primers used in this study.

**Supplementary Table 2.** Detection of honey bee mRNA in *Varroa* mites by RT-qPCR.

**Supplementary Table 3.** Detection and quantification of honey bee mRNAs in RNAseq libraries from phoretic *Varroa* mites following starvation or feeding.

**Supplementary Table 4.** Detection of honey bee mRNAs in RNAseq libraries from different *Varroa* mite developmental stages.

**Supplementary Figure S1.** Alignments of consensus DWV RNA nucleotide sequences from honey bees and mites in Experiment 2: “*Varroa*-mediated DWV transmission experiment”.

**Supplementary Figure S2.** DWV polymorphisms in honey bees and mites in Experiment 2: “*Varroa*-mediated DWV transmission experiment”.

**Supplementary Figure S3.** Single stranded RNA degradation in disrupted honey bee hemolymph cells.

**Supplementary Table 1. Primers used in this study.**

| Primer ID             | Nucleotide sequence (5' to 3')              | Target: GenBank accession number, (position in the nucleotide sequence), polarity | Applications                                        |
|-----------------------|---------------------------------------------|-----------------------------------------------------------------------------------|-----------------------------------------------------|
| <b>DWV-qPCR-F</b>     | GAGATTGAAGCGCATGAACA                        | AY292384, (6471- 6490), sense                                                     | DWV RT-qPCR                                         |
| <b>DWV-qPCR-R</b>     | tgaattcagtgctgccata                         | AY292384, (6600 - 6581), complement                                               | DWV RT-qPCR                                         |
| <b>Varr-qbACT-R</b>   | TGAAGGTAGTCTCATGGATAC                       | XR_002672520 , (142 - 122) complement                                             | Varroa actin mRNA RT-qPCR                           |
| <b>Varr-qbACT-F</b>   | GTCTCTGTTCCAGCCCTCGTTC                      | XR_002672520, (81 - 102), sense                                                   | Varroa actin mRNA qRT-PCR                           |
| <b>Amel-qbACT-F</b>   | AGGAATGGAAGCTTGCGGTA                        | NM_001185146, (919 - 938), sense                                                  | Honey bee actin mRNA RT-qPCR                        |
| <b>Amel-qbACT-R</b>   | AATTTTCATGGTGGATGGTGC                       | NM_001185146, (1099 - 1079), complement                                           | Honey bee actin mRNA RT-qPCR                        |
| <b>DWV900F</b>        | GTTAATGTCTCATAGCCAGACG                      | AY292384, (899 - 921), sense                                                      | RT-PCR, 1.2 kbp fragment, DWV strain identification |
| <b>DWV2050Rev</b>     | CATATAGCATCAGAATTAGCCTC                     | AY292384, (2071 - 2049), complement                                               | RT-PCR, 1.2 kbp fragment, DWV strain identification |
| <b>APO3Q-F1</b>       | GCGAAATCTCTGAGCCAAC                         | NM_001114198, (473 - 491), sense                                                  | Honey bee Apo3 mRNA RT-qPCR                         |
| <b>APO3Q-R1</b>       | GAGTTGCGGCAGTTTGAAG                         | NM_001114198 (599 - 581), complement                                              | Honey bee Apo3 mRNA RT-qPCR                         |
| <b>Tag1-DWV-For</b>   | CTTGTTAGCTGTGTGCAGTTGCTGTAGTCAAGCGTTACTTGAG | AY292384, (4909 - 4934), sense                                                    | Negative-strand DWV RNA detection (Assay 1), RT     |
| <b>DWV-1-rev</b>      | GGAGCTTCTGGAACGGCAGAT                       | AY292384, (5008 - 4988), complement                                               | Negative-strand DWV RNA detection (Assay 1), qPCR   |
| <b>Tag1</b>           | CTTGTTAGCTGTGTGCAGTTG                       | not applicable                                                                    | Negative-strand DWV RNA detection (Assay 1), qPCR   |
| <b>Tag2-DWV-2-For</b> | AGCCTGCGCACGTGGcgaaccaactctgaggaa           | AY292384, (7330 - 7349), sense                                                    | Negative-strand DWV RNA detection (Assay 2), RT     |
| <b>DWV-2-rev</b>      | GTGTTGATCCCTGAGGCTTA                        | AY292384, (7503 - 7484), complement                                               | Negative-strand DWV RNA detection (Assay 2), qPCR   |
| <b>Tag2</b>           | AGCCTGCGCACGTGG                             | not applicable                                                                    | Negative-strand DWV RNA detection (Assay 2), qPCR   |

**Supplementary Table 2. Detection of honey bee mRNA in *Varroa* mites by RT-qPCR.** Ct values for honey bee actin (BeeBase gene identifier GB44311) and Apolipoprotein III-like, Apo3 (BeeBase gene identifier GB55452) mRNAs, *Varroa destructor* actin (GenBank Accession XR\_002672520) mRNA, and DWV genomic RNA in pooled *Varroa* mite and control honey bee pupae.

| Pooled samples             | DWV RNA | <i>Varroa</i> actin mRNA | Honey bee actin mRNA | Honey bee Apo3 mRNA |
|----------------------------|---------|--------------------------|----------------------|---------------------|
| <b><i>Varroa</i> mites</b> |         |                          |                      |                     |
| V-Pho <sub>1</sub>         | 25.8    | 19.7                     | 26.8                 | 36.6                |
| V0-PBS <sub>1</sub>        | nd      | 21.9                     | 31.0                 | nd                  |
| V0-DWV <sub>1</sub>        | 14.7    | 22.8                     | 36.4                 | 41.2                |
| V4-PBS <sub>1</sub>        | 25.1    | 24.4                     | 34.2                 | nd                  |
| V4-DWV <sub>1</sub>        | 21.5    | 22.8                     | 33.5                 | 37.9                |
| <b>Honey bee pupae</b>     |         |                          |                      |                     |
| P0-DWV <sub>1</sub>        | 11.0    | nd                       | 17.3                 | 23.6                |
| P4-DWV <sub>1</sub>        | 18.0    | nd                       | 24.3                 | 31.3                |
| <b>Water control</b>       | nd      | nd                       | nd                   | nd                  |

nd - not detected

**Supplementary Table 3. Detection and quantification of honey bee mRNAs in RNAseq libraries from phoretic *Varroa* mites following starvation or feeding.** Numbers of NGS reads corresponding a set of *Varroa* and honey bee mRNAs as well as DWV genomic RNA were determined in *Varroa destructor* RNAseq libraries (Egekwu & Cook, submitted).

| Varroa RNA-seq library ID                                                          |                                                                      | Var_C333_VaD_WaS_12H                | Var_C3_VaD_WaF_15H                                  | Var_C3_VaD_WpF_15H                                 |
|------------------------------------------------------------------------------------|----------------------------------------------------------------------|-------------------------------------|-----------------------------------------------------|----------------------------------------------------|
| <b>Varroa mite treatment</b>                                                       |                                                                      | Phoretic mites starved for 12 hours | Phoretic mites fed on adult honey bees for 15 hours | Phoretic mites fed on honey bee pupae for 15 hours |
| <b>Total number of reads in the library</b>                                        |                                                                      | 59560566                            | 49673302                                            | 65165306                                           |
| <b>DWV reads</b>                                                                   |                                                                      | 38870677                            | 18964968                                            | 24572362                                           |
| <b>Reads numbers ratio, honey bee beta-actin mRNA to <i>Varroa</i> beta-actin</b>  |                                                                      | 0.017                               | 0.039                                               | 0.034                                              |
| <b>Reads numbers ratio, total honey bee mRNAs to <i>Varroa</i> beta-actin mRNA</b> |                                                                      | 2.540                               | 24.152                                              | 19.066                                             |
| <b><i>Apis mellifera</i> mRNA</b>                                                  | <b><i>A. mellifera</i> beta-actin (GB44311) NM_001185146</b>         | 626                                 | 674                                                 | 836                                                |
|                                                                                    | <b><i>A. mellifera</i> myosin heavy chain (GB51653)</b>              | 1428                                | 4094                                                | 5231                                               |
|                                                                                    | <b><i>A. mellifera</i> apolipoprotein III-like protein (GB55452)</b> | 1                                   | 240                                                 | 220                                                |
| <b>Total <i>A. mellifera</i> mRNAs reads</b>                                       |                                                                      | 92604                               | 414034                                              | 470256                                             |
| <b><i>Varroa destructor</i> mRNA</b>                                               | <b>XR_002672520, <i>V. destructor</i> beta actin</b>                 | 36462                               | 17143                                               | 24665                                              |
|                                                                                    | <b><i>V. destructor</i> myosin heavy chain</b>                       | 2246                                | 3318                                                | 4859                                               |
|                                                                                    | <b><i>V. destructor</i> vitellogenin 1 JQ974976</b>                  | 1901                                | 773                                                 | 1289                                               |

**Supplementary Table 4. Detection of honey bee mRNAs in RNAseq libraries from different *Varroa* mite developmental stages.** Numbers of NGS reads corresponding a set of *Varroa* and honey bee mRNAs were determined in *Varroa destructor* RNAseq libraries<sup>23</sup> (NCBI BioProject PRJNA392105).

| <i>Varroa destructor</i> RNA-seq library, accession number, mite description |                                                                  | SRX2960636<br>Emerging mites (collected from P8 to P9 brood cells) | SRX29606371<br>Young mites (collected from P8 to P9 brood cells) | SRX2960647<br>Young mites (collected from P8 to P9 brood cells) | SRX2960634<br>Laying mites (collected from sealed brood cells containing pre-pupae) | SRX2960649<br>Phoretic mites (collected on adult bees) | SRX2960670<br>Phoretic mites artificially reared in cages with adult bees | SRX2960669<br>Phoretic mites (collected on adult bees) | SRX2960632<br>Arresting mites (collected in unsealed L5 brood cells) |
|------------------------------------------------------------------------------|------------------------------------------------------------------|--------------------------------------------------------------------|------------------------------------------------------------------|-----------------------------------------------------------------|-------------------------------------------------------------------------------------|--------------------------------------------------------|---------------------------------------------------------------------------|--------------------------------------------------------|----------------------------------------------------------------------|
| Total number of reads in the library                                         |                                                                  | 26531852                                                           | 27083570                                                         | 33433690                                                        | 26670037                                                                            | 17467280                                               | 29446920                                                                  | 32563456                                               | 28709594                                                             |
| <i>Apis mellifera</i> mRNAs                                                  | NM_001185146 <i>A. mellifera</i> actin related protein 1 (Arp1)  | 140                                                                | 473                                                              | 683                                                             | 174                                                                                 | 93                                                     | 206                                                                       | 88                                                     | 87                                                                   |
|                                                                              | XM_02644216 <i>A. mellifera</i> myosin heavy chain               | 122                                                                | 758                                                              | 355                                                             | 36                                                                                  | 56                                                     | 92                                                                        | 57                                                     | 14                                                                   |
|                                                                              | NM_001114198 <i>A. mellifera</i> apolipoprotein III-like protein | 3                                                                  | 51                                                               | 77                                                              | 11                                                                                  | 1                                                      | 0                                                                         | 0                                                      | 2                                                                    |
| <i>Varroa destructor</i> mRNAs                                               | XR_002672520, <i>V. destructor</i> actin-like protein            | >20000                                                             | >20000                                                           | >20000                                                          | 8606                                                                                | 17838                                                  | >20000                                                                    | 13931                                                  | 9678                                                                 |
|                                                                              | XM_022800959 <i>V. destructor</i> myosin heavy chain             | 2314                                                               | 2523                                                             | 4080                                                            | 1847                                                                                | 1494                                                   | 2920                                                                      | 1017                                                   | 1061                                                                 |
|                                                                              | IQ974976 <i>V. destructor</i> vitellogenin 1                     | 1649                                                               | 524                                                              | 1182                                                            | >20000                                                                              | 848                                                    | 1446                                                                      | 756                                                    | 3405                                                                 |

**Supplementary Figure S1. Alignments of consensus DWV RNA nucleotide sequences from honey bees and mites in Experiment 2: “Varroa-mediated DWV transmission experiment”.** RT-PCR fragments corresponding to the DWV LP region were amplified using RNA extracted from bees and mites pooled according to their treatment (Experiment 2, Figs. 2 and 4). **(a, b)** Complete identity between the DWV sequences amplified from honey bee pupae P0-DWV<sub>2</sub>, P1-DWV<sub>2</sub>, and the cloned isolate DWV-304. **(c, d)** Complete nucleotide identity between the sequenced terminal portions of the RT-PCR fragment amplified from V0-DWV<sub>2</sub> mites, the sequences from honey bee pupae P0-DWV<sub>2</sub>, P1-DWV<sub>2</sub>, and the cloned isolate DWV-304. Due to high polymorphism in the mite DWV load only the terminal portions of V0-DWV<sub>2</sub> were sequenced. Cloned DWV isolate DWV-304 (GenBank accession number MG831200, isolated in the USA in 2015) was used for pupae P0-DWV<sub>2</sub> injection. The type DWV isolate DWV-PA isolated the USA in 2006 (GenBank Accession number AY292384), was included with alignments **(b)** and **(c)** to show distribution of polymorphic sites in the LP region of DWV RNA.

**(a)**

|                    |                                                                  |      |
|--------------------|------------------------------------------------------------------|------|
| DWV-304            | agacatcatatntttatntttaaagctgctcttttattgctgattatnttggctgnttttattt | 1020 |
| Pupae-P0-DWV-2     | -----TATTTTAATGCTGCTTTATTTGCTGATTATTTTGCCTGTTTTATTT              | 47   |
| Pupae-P1-DWV-Ext-2 | -----CATATTTTATTTTAATGCTGCTTTATTTGCTGATTATTTTGCCTGTTTTATTT       | 54   |
|                    | *****                                                            |      |
| DWV-304            | gctatnttatatnttggtaattttcattattgcaaatatattacattgctatntttatta     | 1080 |
| Pupae-P0-DWV-2     | GCTATTTTATATTTGCTAATTTTCATTATTGCGAAATATATTACATTGCTATTTTATTTA     | 107  |
| Pupae-P1-DWV-Ext-2 | GCTATTTTATATTTGCTAATTTTCATTATTGCGAAATATATTACATTGCTATTTTATTTA     | 114  |
|                    | *****                                                            |      |
| DWV-304            | tatacgctagattcaatntttatntttcctatatntttcaatnttatttggatnttgaaggt   | 1140 |
| Pupae-P0-DWV-2     | TATACGCTAGATTCAATTTTATTTTCCATATTTTCAATTTAATTTTGATTTTGAAGGT       | 167  |
| Pupae-P1-DWV-Ext-2 | TATACGCTAGATTCAATTTTATTTTCCATATTTTCAATTTAATTTTGATTTTGAAGGT       | 174  |
|                    | *****                                                            |      |
| DWV-304            | aaatatatataaattaattataaaaaatggccttcagttgtggaactctctcctactctgc    | 1200 |
| Pupae-P0-DWV-2     | AAATATATATAAATTAATTTATTTAAAAATGGCCTTCAGTTGTGGAACCTCTCCTACTCTGC   | 227  |
| Pupae-P1-DWV-Ext-2 | AAATATATATAAATTAATTTATTTAAAAATGGCCTTCAGTTGTGGAACCTCTCCTACTCTGC   | 234  |
|                    | *****                                                            |      |
| DWV-304            | tgtcgcccaagctccgctccgttgcccatgcacctcgatcgatgggaagttgatgaagccag   | 1260 |
| Pupae-P0-DWV-2     | TGTCGCCCAAGCTCCGCTCCGTTGCCATGCACCTCGTACATGGGAAGTTGATGAAGCCAG     | 287  |
| Pupae-P1-DWV-Ext-2 | TGTCGCCCAAGCTCCGCTCCGTTGCCATGCACCTCGTACATGGGAAGTTGATGAAGCCAG     | 294  |
|                    | *****                                                            |      |
| DWV-304            | gcgcgccgagtcacaaacgnttggcgctggagcaagaacgatttcgcaacgnttcttga      | 1320 |
| Pupae-P0-DWV-2     | GCGGCGCCGAGTCATCAAACGTTTGGCGCTGGAGCAAGAACGATTTCCGCAACGTTCTTGA    | 347  |
| Pupae-P1-DWV-Ext-2 | GCGGCGCCGAGTCATCAAACGTTTGGCGCTGGAGCAAGAACGATTTCCGCAACGTTCTTGA    | 354  |
|                    | *****                                                            |      |
| DWV-304            | cgccggcgtctatgaccaggcgacatgggaacaggaggacgcgcgcgataaatgagttcct    | 1380 |
| Pupae-P0-DWV-2     | CGCCGGCGTCTATGACCAGGCGACATGGGAACAGGAGGACGCGCGGATAAATGAGTTCCCT    | 407  |
| Pupae-P1-DWV-Ext-2 | CGCCGGCGTCTATGACCAGGCGACATGGGAACAGGAGGACGCGCGGATAAATGAGTTCCCT    | 414  |
|                    | *****                                                            |      |
| DWV-304            | aacggaacaattaacaatnttatataactatnttctgatcgccgaacgnttgcacgctcg     | 1440 |
| Pupae-P0-DWV-2     | AACGGAACAATTAACAATTTATATACTATTTATTCGATCGCCGAACGTTGCACGCGTCCG     | 467  |
| Pupae-P1-DWV-Ext-2 | AACGGAACAATTAACAATTTATATACTATTTATTCGATCGCCGAACGTTGCACGCGTCCG     | 474  |
|                    | *****                                                            |      |
| DWV-304            | acctattaagagcactctcctatatcagtttctgaataggttctgctccattggaatccct    | 1500 |
| Pupae-P0-DWV-2     | ACCTATTAAGAGCACTCTCCTATATCAGTTTTCGAATAGGTTTGCCTCCATTGGAATCCCT    | 527  |
| Pupae-P1-DWV-Ext-2 | ACCTATTAAGAGCACTCTCCTATATCAGTTTTCGAATAGGTTTGCCTCCATTGGAATCCCT    | 534  |
|                    | *****                                                            |      |
| DWV-304            | caaagtcgaggtcggtaagaagcaggcgaatgtatatntttaaagaacctaaatacacgcg    | 1560 |
| Pupae-P0-DWV-2     | CAAAGTCGAGGTCGGTCAAGAAGCAGGCGAATGTATATTTAAGAAACCTAAATACACGCG     | 587  |
| Pupae-P1-DWV-Ext-2 | CAAAGTCGAGGTCGGTCAAGAAGCAGGCGAATGTATATTTAAGAAACCTAAATACACGCG     | 594  |
|                    | *****                                                            |      |

|                    |                                                                         |      |
|--------------------|-------------------------------------------------------------------------|------|
| DWV-304            | cgtttgcaagaaagtgaagcgtgttgcaacccgcttcggtcgtaaaaagttggtcgcc              | 1620 |
| Pupae-P0-DWV-2     | CGTTTGCAAGAAAGTGAAGCGTGTGCAACCCGCTTCGTTTCGTGAAAAAGTTGTTTCGTCC           | 647  |
| Pupae-P1-DWV-Ext-2 | CGTTTGCAAGAAAGTGAAGCGTGTGCAACCCGCTTCGTTTCGTGAAAAAGTTGTTTCGTCC<br>*****  | 654  |
| DWV-304            | tatgtgttctagatctcctatgctattatattaagcttaagaaaattatattatgatttgca          | 1680 |
| Pupae-P0-DWV-2     | TATGTGTTCTAGATCTCCTATGCTATTATTTAAGCTTAAGAAAATTTATTTATGATTTGCA           | 707  |
| Pupae-P1-DWV-Ext-2 | TATGTGTTCTAGATCTCCTATGCTATTATTTAAGCTTAAGAAAATTTATTTATGATTTGCA<br>*****  | 714  |
| DWV-304            | cttatatagattaagaaaacagattaggatgtttgagacgtcaaaaacagcgcgagatgga           | 1740 |
| Pupae-P0-DWV-2     | CTTATATAGATTAAGAAAACAGATTAGGATTTTTCGACGCTCAAAAACAGCGCGAGTATGA           | 767  |
| Pupae-P1-DWV-Ext-2 | CTTATATAGATTAAGAAAACAGATTAGGATTTTTCGACGCTCAAAAACAGCGCGAGTATGA<br>*****  | 774  |
| DWV-304            | gtagagtggtgctactaatctgtttacaattatcgaaatccgggtgcaggcaaaaaccagagat        | 1800 |
| Pupae-P0-DWV-2     | GTTAGAGTGTGCTACTAATCTGTTTACAATTATCGAATCCGGTGCAGGCAAAAACCAGAGAT          | 827  |
| Pupae-P1-DWV-Ext-2 | GTTAGAGTGTGCTACTAATCTGTTTACAATTATCGAATCCGGTGCAGGCAAAAACCAGAGAT<br>***** | 834  |
| DWV-304            | ggataaccctaataccaggacctgatggcgaggggtgaagttgaattagaaaaggatagtaa          | 1860 |
| Pupae-P0-DWV-2     | GGATAACCCCTAATCCAGGACCTGATGGCGAGGGTGAAGTTGAATTAGAAAAGGATAGTAA           | 887  |
| Pupae-P1-DWV-Ext-2 | GGATAACCCCTAATCCAGGACCTGATGGCGAGGGTGAAGTTGAATTAGAAAAGGATAGTAA<br>*****  | 894  |
| DWV-304            | tgttggttttaacaactcagcgagatcctagtagatctattccagcgcgggtgagcgtaaa           | 1920 |
| Pupae-P0-DWV-2     | TGTTGTTTTAACAACCTCAGCGAGATCCTAGTACATCTATTCCAGCGCCGGTGAGCGTAAA           | 947  |
| Pupae-P1-DWV-Ext-2 | TGTTGTTTTAACAACCTCAGCGAGATCCTAGTACATCTATTCCAGCGCCGGTGAGCGTAAA<br>*****  | 954  |
| DWV-304            | atggagtagatggactagtaatgatgtagtagatgattacgccacaatcacatctcgatg            | 1980 |
| Pupae-P0-DWV-2     | ATGGAGTAGATGGACTAGTAATGATGATGATGATTACGCCACAATCACATCTCGATG               | 1007 |
| Pupae-P1-DWV-Ext-2 | ATGGAGTAGATGGACTAGTAATGATGATGATGATTACGCCACAATCACATCTCGATG<br>*****      | 1014 |
| DWV-304            | gtatcagattgctgaatttgggtcgaaggatgatccatttgataaggagttagcacg               | 2040 |
| Pupae-P0-DWV-2     | GTATCAGATTGCTGAATTTGTTGGTTCGAAGGATGATCCATTTGATAAGGAGTTAGCACG            | 1067 |
| Pupae-P1-DWV-Ext-2 | GTATCAGATTGCTGAATTTGTTGGTTCGAAGGATGATCCATTTGATAAGGAGTTAGCACG<br>*****   | 1074 |

**(b)**

|                    |                                                                        |      |
|--------------------|------------------------------------------------------------------------|------|
| DWV-PA             | AGACATCATATTTTATTTAATGCTGCTTTTATGCTGATTTATCTTGCTGTTTTTATTT             | 994  |
| DWV-304            | agacatcatatthttatthttaatgctgcttttattgctgatttattttgctgthtttatttt        | 1020 |
| Pupae-P0-DWV-2     | -----TATTTAATGCTGCTTTTATGCTGATTTATTTGCTGTTTTTATTT                      | 47   |
| Pupae-P1-DWV-Ext-2 | -----CATATTTATTTAATGCTGCTTTTATGCTGATTTATTTGCTGTTTTTATTT<br>*****       | 54   |
| DWV-PA             | GCTATTTTATATTTGCTAATTTTCATTATTTGCGAAATATATTACATTGCTATTTTATTA           | 1054 |
| DWV-304            | gctatthttatatttgctaattttcattatggcgaataatattacattgctatthttatta          | 1080 |
| Pupae-P0-DWV-2     | GCTATTTTATATTTGCTAATTTTCATTATTTGCGAAATATATTACATTGCTATTTTATTA           | 107  |
| Pupae-P1-DWV-Ext-2 | GCTATTTTATATTTGCTAATTTTCATTATTTGCGAAATATATTACATTGCTATTTTATTA<br>*****  | 114  |
| DWV-PA             | TATACGCTAGATTCAATTTTATTTTTCATATTTTCAATTTAATTTTGATTTGGAAGGT             | 1114 |
| DWV-304            | tatacgtagattcaatthttatthttccctatattttcaatthttatthttgattttgaaggt        | 1140 |
| Pupae-P0-DWV-2     | TATACGCTAGATTCAATTTTATTTTTCATATTTTCAATTTAATTTTGATTTTGAAGGT             | 167  |
| Pupae-P1-DWV-Ext-2 | TATACGCTAGATTCAATTTTATTTTTCATATTTTCAATTTAATTTTGATTTTGAAGGT<br>*****    | 174  |
| DWV-PA             | AAATATATATAATTAATTTAATAAAATGGCCTTTAGTTGTTGGAACCTCTTCTACTCTGC           | 1174 |
| DWV-304            | aaatataataaataattataaaaaatggccttcagttgtggaactctctcctactctgc            | 1200 |
| Pupae-P0-DWV-2     | AAATATATATAATTAATTTAATAAAATGGCCTTCAGTTGTTGGAACCTCTCTCTACTCTGC          | 227  |
| Pupae-P1-DWV-Ext-2 | AAATATATATAATTAATTTAATAAAATGGCCTTCAGTTGTTGGAACCTCTCTCTACTCTGC<br>***** | 234  |
| DWV-PA             | CGTCGCCAAGCTCCGCTCGTCCATGACACCTCGTACATGGGAAGTTGATGAAGCTAG              | 1234 |
| DWV-304            | gtcgcgcaagctccgctcggctccatgcacctcgtacatgggaagttgatgaagccag             | 1260 |
| Pupae-P0-DWV-2     | TGTCGCCAAGCTCCGCTCGTCCATGACACCTCGTACATGGGAAGTTGATGAAGCCAG              | 287  |
| Pupae-P1-DWV-Ext-2 | TGTCGCCAAGCTCCGCTCGTCCATGACACCTCGTACATGGGAAGTTGATGAAGCCAG<br>*****     | 294  |

|                    |                                                                        |      |
|--------------------|------------------------------------------------------------------------|------|
| DWV-PA             | GCGGCGCCGAGTCATTAACGTTTGGCGCTGGAGCAAGAACGTATTCGTAACGTTCTTGA            | 1294 |
| DWV-304            | gcgccgcccagatcatcaaacgtttggcgctggagcaagaacgtattcgcacggttcttga          | 1320 |
| Pupae-P0-DWV-2     | GCGGCGCCGAGTCATCAACGTTTGGCGCTGGAGCAAGAACGTATTCGCAACGTTCTTGA            | 347  |
| Pupae-P1-DWV-Ext-2 | GCGGCGCCGAGTCATCAACGTTTGGCGCTGGAGCAAGAACGTATTCGCAACGTTCTTGA<br>*****   | 354  |
| DWV-PA             | CGTFGGCGTCTATGACCAGGCGACATGGGAACAGGAGGACGCGCGGATAATGAGTTCCT            | 1354 |
| DWV-304            | cgccggcgctctatgaccagggcgacatgggaacaggaggacgcgcgataatgagttcct           | 1380 |
| Pupae-P0-DWV-2     | CGCCGGCGTCTATGACCAGGCGACATGGGAACAGGAGGACGCGCGGATAATGAGTTCCT            | 407  |
| Pupae-P1-DWV-Ext-2 | CGCCGGCGTCTATGACCAGGCGACATGGGAACAGGAGGACGCGCGGATAATGAGTTCCT<br>**      | 414  |
| DWV-PA             | AACGGAACAATTAACAATTTATATACTATTTATTCGATCGCTGAACGTTGTACGCGTGC            | 1414 |
| DWV-304            | aacggaacaattaacaatttatatactattttatcgcgacggtgacgagcgtgcacgctcg          | 1440 |
| Pupae-P0-DWV-2     | AACGGAACAATTAACAATTTATATACTATTTATTCGATCGCGGAACGTTGCACGCGTGC            | 467  |
| Pupae-P1-DWV-Ext-2 | AACGGAACAATTAACAATTTATATACTATTTATTCGATCGCGGAACGTTGCACGCGTGC<br>*****   | 474  |
| DWV-PA             | GCCTATCAAAGAGTACTCTCCTATATCAGTTTCGAATAGGTTTGTCTCCACTGGAATCCCT          | 1474 |
| DWV-304            | acctattaagagactctcctatatcagtttcgaataggtttgtctccactggaatccct            | 1500 |
| Pupae-P0-DWV-2     | ACCTATTAAGAGCACTCTCCTATATCAGTTTCGAATAGGTTTGTCTCCACTGGAATCCCT           | 527  |
| Pupae-P1-DWV-Ext-2 | ACCTATTAAGAGCACTCTCCTATATCAGTTTCGAATAGGTTTGTCTCCACTGGAATCCCT<br>*****  | 534  |
| DWV-PA             | CAAGGTCGAGGTCGGTCAAGAAGCAGGCGAATGTATATTTAAGAAACCTAAATATACGCG           | 1534 |
| DWV-304            | caagtcgaggtcggtaagaagcaggcgcaatgtatatttaagaacctaataacacgcg             | 1560 |
| Pupae-P0-DWV-2     | CAAAGTCGAGGTCGGTCAAGAAGCAGGCGAATGTATATTTAAGAAACCTAAATACACGCG           | 587  |
| Pupae-P1-DWV-Ext-2 | CAAAGTCGAGGTCGGTCAAGAAGCAGGCGAATGTATATTTAAGAAACCTAAATACACGCG<br>***    | 594  |
| DWV-PA             | CGTTTGCAAGAAAGTGAAGCGTGTGCAACTCGCTTCGTTTCGTGAAAAAGTTGTTTCGTCC          | 1594 |
| DWV-304            | cgtttgcaagaaagtgaagcgtgtgcaacctcgttcggtgaaaaagttgttcgtcc               | 1620 |
| Pupae-P0-DWV-2     | CGTTTGCAAGAAAGTGAAGCGTGTGCAACTCGCTTCGTTTCGTGAAAAAGTTGTTTCGTCC          | 647  |
| Pupae-P1-DWV-Ext-2 | CGTTTGCAAGAAAGTGAAGCGTGTGCAACTCGCTTCGTTTCGTGAAAAAGTTGTTTCGTCC<br>***** | 654  |
| DWV-PA             | TATGTGTTCTAGATCCCTATGCTATTATTTAAGCTTAAGAAAATTTATTTATGATTTGCA           | 1654 |
| DWV-304            | tatgtgttctagatctcctatgctattatttaagcttaagaaaattttatgatttgca             | 1680 |
| Pupae-P0-DWV-2     | TATGTGTTCTAGATCTCCTATGCTATTATTTAAGCTTAAGAAAATTTATTTATGATTTGCA          | 707  |
| Pupae-P1-DWV-Ext-2 | TATGTGTTCTAGATCTCCTATGCTATTATTTAAGCTTAAGAAAATTTATTTATGATTTGCA<br>***** | 714  |
| DWV-PA             | CTTATATAGATTAAGAAAACAGATTAGGATGTTGAGACGTCAAAAACAGCGGATACGA             | 1714 |
| DWV-304            | cttatatagattaagaaaacagattaggatggtgagacgctcaaaaacagcgagatgca            | 1740 |
| Pupae-P0-DWV-2     | CTTATATAGATTAAGAAAACAGATTAGGATTTTGGAGACGTCAAAAACAGCGGATACGA            | 767  |
| Pupae-P1-DWV-Ext-2 | CTTATATAGATTAAGAAAACAGATTAGGATTTTGGAGACGTCAAAAACAGCGGATACGA<br>*****   | 774  |
| DWV-PA             | GTTAGAGTGTGTCACTAATCTGTACAATTATCGAATCCGGTGCAGGCAAAACCAGAGAT            | 1774 |
| DWV-304            | gtagagtgtgtcactaactctgttacaattatcgaatccgggtgcaggcaaaaccagagat          | 1800 |
| Pupae-P0-DWV-2     | GTTAGAGTGTGTCACTAATCTGTACAATTATCGAATCCGGTGCAGGCAAAACCAGAGAT            | 827  |
| Pupae-P1-DWV-Ext-2 | GTTAGAGTGTGTCACTAATCTGTACAATTATCGAATCCGGTGCAGGCAAAACCAGAGAT<br>*****   | 834  |
| DWV-PA             | GGATAACCCCTAATCCAGGACCTGATGGCGAGGGTGAAGTTGAATTAGAAAAGGATAGTAA          | 1834 |
| DWV-304            | ggataaccctaataccaggacctgatggcgaggggtgaagttgaattagaaaaggatagtaa         | 1860 |
| Pupae-P0-DWV-2     | GGATAACCCCTAATCCAGGACCTGATGGCGAGGGTGAAGTTGAATTAGAAAAGGATAGTAA          | 887  |
| Pupae-P1-DWV-Ext-2 | GGATAACCCCTAATCCAGGACCTGATGGCGAGGGTGAAGTTGAATTAGAAAAGGATAGTAA<br>***** | 894  |
| DWV-PA             | TGTTGTTTTAACAACTCAGCGAGATCCTAGTACATCTATTCAGCGCCGGTGAGCGTAAA            | 1894 |
| DWV-304            | tgttgttttaacaaactcagcgagatcctagtacatctatccagcgccggtgagcgtaaa           | 1920 |
| Pupae-P0-DWV-2     | TGTTGTTTTAACAACTCAGCGAGATCCTAGTACATCTATTCAGCGCCGGTGAGCGTAAA            | 947  |
| Pupae-P1-DWV-Ext-2 | TGTTGTTTTAACAACTCAGCGAGATCCTAGTACATCTATTCAGCGCCGGTGAGCGTAAA<br>*****   | 954  |
| DWV-PA             | ATGGAGTAGATGGACTAGTAATGATGTAGTAGATGATTACGCCACAATCACATCTCGATG           | 1954 |
| DWV-304            | atggagtagatggactagtaatgatgtagtagatgattacgccacaatcacatctcgatg           | 1980 |
| Pupae-P0-DWV-2     | ATGGAGTAGATGGACTAGTAATGATGTAGTAGATGATTACGCCACAATCACATCTCGATG           | 1007 |
| Pupae-P1-DWV-Ext-2 | ATGGAGTAGATGGACTAGTAATGATGTAGTAGATGATTACGCCACAATCACATCTCGATG<br>*****  | 1014 |
| DWV-PA             | GTATCAGATTGCTGAATTTGTTTGGTCAAGGATGATCCATTTGATAAGGAGTTAGCACC            | 2014 |
| DWV-304            | gtatcagattgctgaatttgtttgggtcaaggatgatccatTTGATAAGGAGTTAGCACC           | 2040 |
| Pupae-P0-DWV-2     | GTATCAGATTGCTGAATTTGTTTGGTCAAGGATGATCCATTTGATAAGGAGTTAGCACC            | 1067 |
| Pupae-P1-DWV-Ext-2 | GTATCAGATTGCTGAATTTGTTTGGTCAAGGATGATCCATTTGATAAGGAGTTAGCACC<br>*****   | 1074 |



(c)

|                    |                                                                       |      |
|--------------------|-----------------------------------------------------------------------|------|
| V0-DWV-2           | -----TCATATTTGCTGCTTTATTGCTGATTTATTTGCTGTTTTTATTT                     | 55   |
| DWV-304            | agacatcatatattttattttaatgctgtctttattgctgatttattttgctgtttttattt        | 1020 |
| Pupae-P0-DWV-2     | -----TATTTTAATGCTGCTTTATTGCTGATTTATTTGCTGTTTTTATTT                    | 47   |
| Pupae-P1-DWV-Ext-2 | -----CATATTTTATTTTAAATGCTGCTTTATTGCTGATTTATTTGCTGTTTTTATTT<br>*****   | 54   |
| V0-DWV-2           | GCTATTTTATATTTGCTAATTTTCATTATTGCGAAATATATTACATTGCTATTTTATTA           | 115  |
| DWV-304            | gctattttataatttgctaattttcattattgCGAAATATATTACATTGCTATTTTATTA          | 1080 |
| Pupae-P0-DWV-2     | GCTATTTTATATTTGCTAATTTTCATTATTGCGAAATATATTACATTGCTATTTTATTA           | 107  |
| Pupae-P1-DWV-Ext-2 | GCTATTTTATATTTGCTAATTTTCATTATTGCGAAATATATTACATTGCTATTTTATTA<br>*****  | 114  |
| V0-DWV-2           | TATACGCTAGATTCAATTTTATTTTCCCTATATTTCAATTTAATTTTGATTTTGAAGGT           | 175  |
| DWV-304            | tatacgttagattcaattttatttttccctataattttcaatttaattttgattttgaaggt        | 1140 |
| Pupae-P0-DWV-2     | TATACGCTAGATTCAATTTTATTTTCCCTATATTTCAATTTAATTTTGATTTTGAAGGT           | 167  |
| Pupae-P1-DWV-Ext-2 | TATACGCTAGATTCAATTTTATTTTCCCTATATTTCAATTTAATTTTGATTTTGAAGGT<br>*****  | 174  |
| V0-DWV-2           | AAATATATATAATTAATTTATTAATAATGGCCTTnnnnnnnnnnnnnnnnnnnnnnnn            | 235  |
| DWV-304            | aaatataataaatttaattataaaaaatggccttcagttgtggaactctctcctactctgc         | 1200 |
| Pupae-P0-DWV-2     | AAATATATATAATTAATTTATTAATAATGGCCTTCAGTTGTGGAACCTCTCCTACTCTGC          | 227  |
| Pupae-P1-DWV-Ext-2 | AAATATATATAATTAATTTATTAATAATGGCCTTCAGTTGTGGAACCTCTCCTACTCTGC<br>***** | 234  |
| V0-DWV-2           | nnnnnnnnnnnnnnnnnnnnnnnnnnnnnnnnnnnnnnnnnnnnnnnnnnnnnnnn              | 295  |
| DWV-304            | tgctgcccagctccgctcgttgcccatgcacctcgtacatgggaagttgatgaagccag           | 1260 |
| Pupae-P0-DWV-2     | TGTCGCCCAAGCTCCGTCGCTTGCCCATGCACCTCGTACATGGGAAGTTGATGAAGCCAG          | 287  |
| Pupae-P1-DWV-Ext-2 | TGTCGCCCAAGCTCCGTCGCTTGCCCATGCACCTCGTACATGGGAAGTTGATGAAGCCAG          | 294  |
| V0-DWV-2           | nnnnnnnnnnnnnnnnnnnnnnnnnnnnnnnnnnnnnnnnnnnnnnnnnnnnnnnn              | 355  |
| DWV-304            | gcgcgccgagtcatacaaacggtttggcgctggagcaagaacgtattcgcaacgcttctga         | 1320 |
| Pupae-P0-DWV-2     | GCGGCGCCGAGTCATCAAACGTTTGGCGCTGGAGCAAGAACGTATTCGCAACGTTCTTGA          | 347  |
| Pupae-P1-DWV-Ext-2 | GCGGCGCCGAGTCATCAAACGTTTGGCGCTGGAGCAAGAACGTATTCGCAACGTTCTTGA          | 354  |
| V0-DWV-2           | nnnnnnnnnnnnnnnnnnnnnnnnnnnnnnnnnnnnnnnnnnnnnnnnnnnnnnnn              | 415  |
| DWV-304            | cgccggcgtctatgaccaggcgacatgggaacaggaggacgCGCGGATAATGAGTTCCT           | 1380 |
| Pupae-P0-DWV-2     | CGCCGGCGTCTATGACCAGGCGACATGGGAACAGGAGGACGCGCGGATAATGAGTTCCT           | 407  |
| Pupae-P1-DWV-Ext-2 | CGCCGGCGTCTATGACCAGGCGACATGGGAACAGGAGGACGCGCGGATAATGAGTTCCT           | 414  |
| V0-DWV-2           | nnnnnnnnnnnnnnnnnnnnnnnnnnnnnnnnnnnnnnnnnnnnnnnnnnnnnnnn              | 475  |
| DWV-304            | aacggaacaattaacaatttatataactatttattcgatcgccgaacgctgcaacgctcg          | 1440 |
| Pupae-P0-DWV-2     | AACGGAACAATTAACAATTTATATACTATTTATTCGATCGCCGAACGTTGCACGCGTGC           | 467  |
| Pupae-P1-DWV-Ext-2 | AACGGAACAATTAACAATTTATATACTATTTATTCGATCGCCGAACGTTGCACGCGTGC           | 474  |
| V0-DWV-2           | nnnnnnnnnnnnnnnnnnnnnnnnnnnnnnnnnnnnnnnnnnnnnnnnnnnnnnnn              | 535  |
| DWV-304            | acctattaagagcactctcctataatcagtttcgaataggtttgctccattggaatccct          | 1500 |
| Pupae-P0-DWV-2     | ACCTATTAAGAGCACTCTCCTATATCAGTTTCGAATAGGTTTGTCTCCATGGAATCCCT           | 527  |
| Pupae-P1-DWV-Ext-2 | ACCTATTAAGAGCACTCTCCTATATCAGTTTCGAATAGGTTTGTCTCCATGGAATCCCT           | 534  |
| V0-DWV-2           | nnnnnnnnnnnnnnnnnnnnnnnnnnnnnnnnnnnnnnnnnnnnnnnnnnnnnnnn              | 594  |
| DWV-304            | caaagtcgaggtcggtaagaagcaggcgaatgtatatttaagaacctaatacacgCG             | 1560 |
| Pupae-P0-DWV-2     | CAAAGTCGAGGTCGGTCAAGAAGCAGGCGAATGTATATTTAAGAAACCTAAATACACGCG          | 587  |
| Pupae-P1-DWV-Ext-2 | CAAAGTCGAGGTCGGTCAAGAAGCAGGCGAATGTATATTTAAGAAACCTAAATACACGCG          | 594  |
| V0-DWV-2           | nnnnnnnnnnnnnnnnnnnnnnnnnnnnnnnnnnnnnnnnnnnnnnnnnnnnnnnn              | 654  |
| DWV-304            | cgtttgcaagaaagtgaagcgtgtgcaaccgcttcgctgtaaaaagttgctcgtcc              | 1620 |
| Pupae-P0-DWV-2     | CGTTTGCAAGAAAGTGAAGCGTGTGCAACCCGCTTCGTTTCGTGAAAAAGTTGTTTCGTCC         | 647  |
| Pupae-P1-DWV-Ext-2 | CGTTTGCAAGAAAGTGAAGCGTGTGCAACCCGCTTCGTTTCGTGAAAAAGTTGTTTCGTCC         | 654  |
| V0-DWV-2           | nnnnnnnnnnnnnnnnnnnnnnnnnnnnnnnnnnnnnnnnnnnnnnnnnnnnnnnn              | 714  |
| DWV-304            | tatgtgttctagatctcctatgctattatttaagccttaagaaaattatttatgatttgca         | 1680 |
| Pupae-P0-DWV-2     | TATGTGTTCTAGATCTCCTATGCTATTATTTAAGCTTAAGAAAATTTATTTATGATTTGCA         | 707  |
| Pupae-P1-DWV-Ext-2 | TATGTGTTCTAGATCTCCTATGCTATTATTTAAGCTTAAGAAAATTTATTTATGATTTGCA         | 714  |
| V0-DWV-2           | nnnnnnnnnnnnnnnnnnnnnnnnnnnnnnnnnnnnnnnnnnnnnnnnnnnnnnnn              | 774  |
| DWV-304            | cttatataagattaagaaaacagatttagattttgagacgtcaaaaacagcgcgagtatga         | 1740 |
| Pupae-P0-DWV-2     | CTTATATAGATTAAGAAAACAGATTAGGATTTTGAGACGTCAAAAACAGCGGAGTATGA           | 767  |
| Pupae-P1-DWV-Ext-2 | CTTATATAGATTAAGAAAACAGATTAGGATTTTGAGACGTCAAAAACAGCGGAGTATGA           | 774  |





**Supplementary Figure S2. DWV polymorphisms in honey bees and mites in Experiment 2: “*Varroa*-mediated DWV transmission experiment”.** Electropherograms of direct Sanger sequencing of RT-PCR fragments corresponding to the DWV LP region were amplified using RNA extracted from bees and mites pooled according to their treatment (Experiment 2, Figs. 2 and 4). **(a)** Honey bee pupae P0-DWV<sub>2</sub>, infected with a clone-derived DWV isolate served as the “source bees”; **(b)** *Varroa* mites V0-DWV<sub>2</sub>, which acquired DWV from the “source bees”; **(c)** Honey bee pupae P1-DWV-Ext<sub>2</sub> infected with DWV strains transmitted by the *Varroa* mites fed first on the “source bees”. Clonal DWV accumulated in the honey bee pupae and divergent DWV accumulated in the *Varroa* mites, as evidenced by the presence of double peaks indicated by arrows.

**(a)** Pupae P0-DWV<sub>2</sub> – clonal DWV

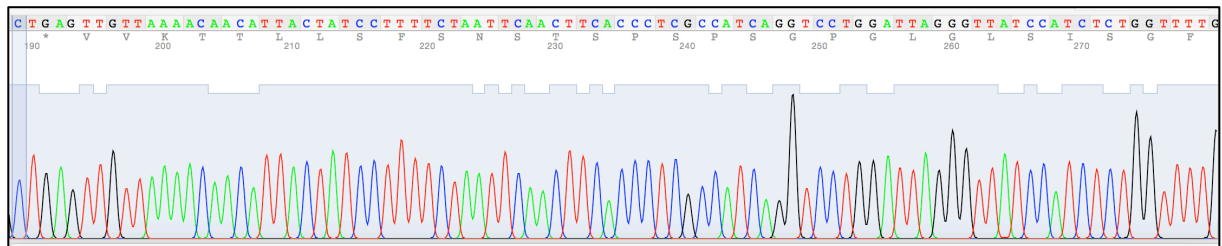

**(b)** *Varroa* mites V0-DWV<sub>2</sub> - polymorphic DWV

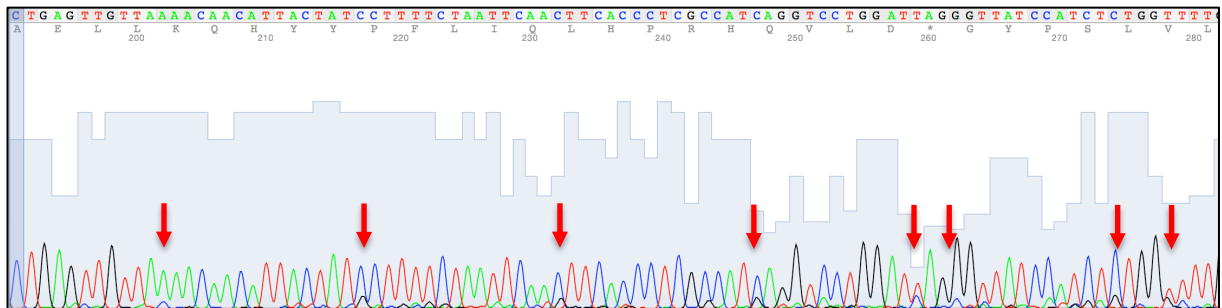

**(c)** Pupae P1-DWV-Ext<sub>2</sub> – clonal DWV

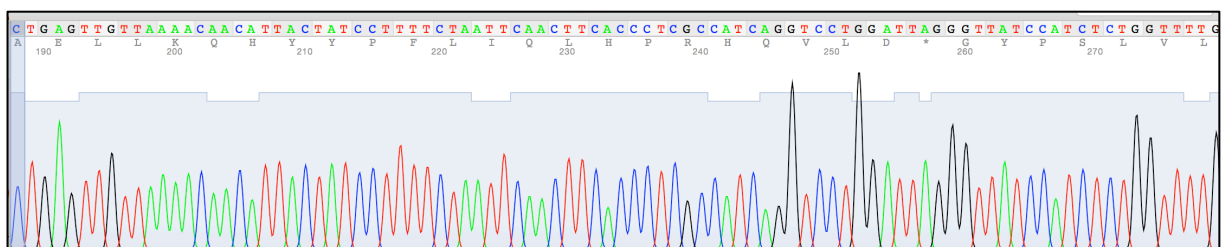

Supplementary Figure S3. Single stranded RNA degradation in disrupted honey bee hemolymph cells.

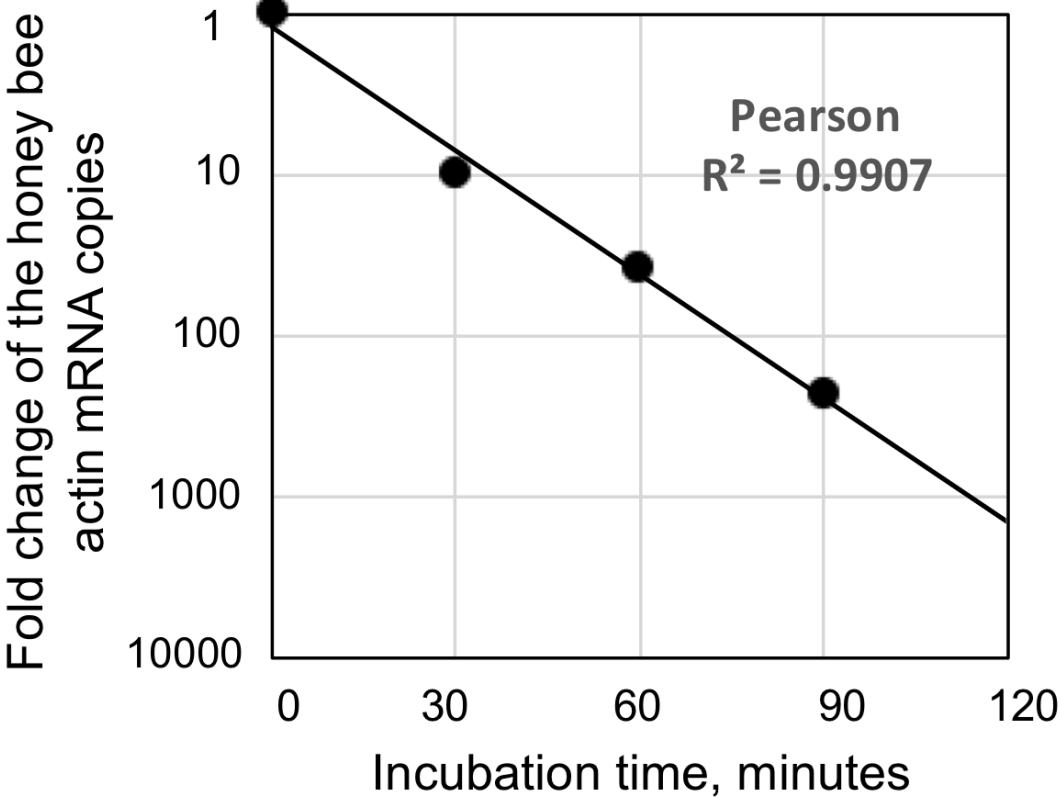

Supplement: 41598_2019_47447_MOESM1_ESM.pdf [file 41598_2019_47447_MOESM1_ESM.pdf]
